1 **Does the Antisecretory Peptide AF-16 modulate fluid**  
2 **balance and inflammation in experimental peritonitis**  
3 **induced sepsis?**

4

5

6 **Authors:** Annelie Barraeta Tenhunen<sup>1,2</sup>, Jaap van der Heijden<sup>2</sup>, Ivan Blokhin<sup>2</sup>, Fabrizia Massaro<sup>1,3</sup>,  
7 Hans Arne Hansson<sup>4</sup>, Ricardo Feinstein<sup>5</sup>, Anders Larsson<sup>1</sup>, Jyrki Tenhunen<sup>2</sup>

8 1. Hedenstierna Laboratory, Dept of Surgical Sciences, Uppsala University, Uppsala, Sweden

9 2. Dept of Surgical Sciences, Division of Anesthesiology and Intensive Care, Uppsala  
10 University, Uppsala, Sweden

11 3. Cardiac Anesthesia and Intensive Care, Anthea Hospital, GVM Care & Research, Bari, Italy

12 4. Institute of Biomedicine, University of Gothenburg, Göteborg, Sweden

13 5. Dept of Pathology and wildlife diseases, National Veterinary Institute, Uppsala, Sweden

14

15

16

17 **Address correspondence:** Annelie Barraeta Tenhunen, Hedenstierna laboratory, Dept of Surgical  
18 Sciences, Uppsala University, 75185 Uppsala, Sweden, E-mail: [annelie.barrueta@surgsci.uu.se](mailto:annelie.barrueta@surgsci.uu.se), Phone  
19 +46186110000 Fax +46186114153

20

21

22 **Short title:** AF-16 in experimental sepsis

## 23 **Abstract**

24 Sepsis is a life-threatening condition due to a dysregulated immunological response to infection. Apart  
25 from source control and broad-spectrum antibiotics, management is based on fluid resuscitation and  
26 vasoactive drugs. Fluid resuscitation implicates the risk of volume overload, which in turn is associated  
27 with longer stay in intensive care, prolonged use of mechanical ventilation and increased mortality.

28 Antisecretory factor (AF), an endogenous protein, is detectable in most tissues and in plasma. The  
29 biologically active site of the protein is located in an 8-peptide sequence, contained in a synthetic 16-  
30 peptide fragment, named AF-16. The protein as well as the peptide AF-16 has multiple modulatory  
31 effects on abnormal fluid transport and edema formation/resolution as well as in a variety of  
32 inflammatory conditions. Apart from its' anti-secretory and anti-inflammatory characteristics, AF is an  
33 inhibitor of capillary leakage in intestine. It is not known whether the protein AF or the peptide AF-16  
34 can ameliorate symptoms in sepsis. We hypothesized that AF-16 decreases the degree of hemodynamic  
35 instability, the need of fluid resuscitation, vasopressor dose and tissue edema in fecal peritonitis.

36 To test the hypothesis, we induced peritonitis and sepsis by injecting autologous fecal solution into  
37 abdominal cavity of anesthetized pigs, and randomized (in a blind manner) the animals to intervention  
38 (AF-16, n=8) or control (saline, n=8) group. After onset of hemodynamic instability (defined as mean  
39 arterial pressure < 60 mmHg maintained for > 5 minutes), resuscitation was initiated by an infusion of  
40 AF-16 or saline. We recorded respiratory and hemodynamic parameters hourly for twenty hours and  
41 collected post mortem tissue samples at the end of the experiment.

42 No differences between the groups were observed regarding hemodynamics, fluid balance, lung  
43 mechanics, gas exchange or histology. This experimental study suggests that AF-16 does not modulate  
44 sepsis symptoms in peritonitis induced sepsis.

45

46

47

## 48 **Introduction**

49 Sepsis is defined as “life-threatening organ dysfunction caused by a dysregulated host response to  
50 infection” [1]. In septic shock profound circulatory and metabolic abnormalities contribute to an increase  
51 in mortality, with up to 40 % in-hospital mortality [1-3]. Requirement of vasopressor therapy to sustain  
52 a mean arterial pressure (MAP) > 65 mmHg in combination with persistent serum lactate level > 2  
53 mmol/L after fluid resuscitation are the clinical hallmarks of septic shock [1]. Sepsis and septic shock  
54 are common and although sepsis mortality is decreasing [4], global estimates still count for more than  
55 30 million cases of sepsis per year with 5.3 million potential fatalities [5].

56 Sepsis management is based on fluid resuscitation, broad-spectrum antibiotics, source control and  
57 vasoactive drugs [6]. Administration of intravenous fluid is fundamental to maintain adequate stroke  
58 volume and perfusion pressure, but as a consequence of fluid therapy patients often present with volume  
59 overload [7]. A positive fluid balance and volume overload is associated with longer stay in intensive  
60 care, prolonged use of mechanical ventilation and increased mortality [8-11].

61 Antisecretory factor (AF) is a 41 kDa protein detectable in most tissues [12]. The protein is secreted to  
62 plasma and becomes activated upon exposure to e.g. bacterial toxins [13]. AF has anti-secretory and  
63 anti-inflammatory properties [12,14,15]. The biologically active site of the protein is located in a 16-  
64 peptide fragment, AF-16, with the sequence VCHSKTRSNPENNVGL [16].

65 AF was first described as a potent inhibitor of intestinal hypersecretion in response to Cholera toxin  
66 [17]. It has since then been discovered to have multiple modulatory effects in altered fluid transport and  
67 edema formation/resolution [18-20] as well as in a variety of inflammatory conditions [14,21,22]. We  
68 have demonstrated in a previous study that AF-16 significantly reduced the fluid accumulation in the  
69 lungs in a porcine ventilator induced lung injury model [23]. AF is constitutively expressed in  
70 macrophages and is detectable in lymphoid organs, including gut-associated lymphoid tissue, spleen and  
71 thymus. The protein also appears to modulate proliferation of T cells [15]. Upon a pro-inflammatory  
72 stimulus AF expression is increased and the protein is redistributed from the perinuclear area to the cell

73 surface [14,15]. This results in down-regulation of the immune response. AF is also an inhibitor of  
74 Cholera toxin induced capillary leakage [24].

75 Sepsis consists of a dysregulation of the fine-tuned balance between the pro- and anti-inflammatory  
76 systems. It is not known if AF or AF-16 could reverse shock symptoms in sepsis. We hypothesized that  
77 the peptide AF-16 could counteract circulatory instability in a porcine model of peritonitis induced  
78 sepsis, by reducing the inflammatory response (as disclosed by histopathology) and/or interstitial edema  
79 formation.

80

## 81 **Materials and methods**

82 The study (protocol: <http://dx.doi.org/10.17504/protocols.io.bdrsi56e>) was approved by the Animal  
83 Ethics Committee in Uppsala (decision 5.8.18-01054/2017). The care of the animals strictly followed  
84 the National Institute of Health guide for the care and use of Laboratory animals (NIH publications No  
85 8023, revised 1978) and all measures were taken to minimize suffering. The study was performed at the  
86 Hedenstierna Laboratory, Uppsala University, Sweden.

87

## 88 **Anesthesia and instrumentation**

89 Sixteen pigs (*Sus scrofa domesticus*) (mean weight 27.3 +/- 2.4 kg) of mixed Swedish, Hampshire and  
90 Yorkshire breeds of both sexes, were sedated with Zoletil Forte (tiletamine and zolazepam) 6 mg/kg and  
91 Rompun (xylazine) 2.2 mg/kg i.m. A peripheral intravenous catheter was introduced in an ear vein. The  
92 animals were after 5-10 min placed supine and a bolus of fentanyl 5-10 µg/kg i.v. was administered,  
93 after which anesthesia was maintained with ketamine 30 mg/kg/h, midazolam 0.1-0.4 mg/kg/h and  
94 fentanyl 4 µg/kg/h, in glucose 2.5%. Esmeron (rocuronium) 2.5 mg/kg/h was added as muscle relaxant  
95 after adequate depth of anesthesia was assured by absence of reaction to painful stimulation between the

96 front hooves. During the first hour thirty ml/kg/h of Ringer's acetate was infused i.v. From the second  
97 hour until induction of peritonitis Ringer's acetate was infused at a rate of 10 ml/kg/h.

98 After induction of anesthesia, the animals were tracheostomized, and a tube of eight mm internal  
99 diameter (Mallinckrodt Medical, Athlone, Ireland) was inserted in the trachea and connected to a  
100 ventilator (Servo I, Maquet, Solna, Sweden). Volume controlled ventilation was maintained with the  
101 following settings: tidal volume ( $V_T$ ) 8 ml/kg, respiratory rate (RR) 25/min, inspiratory/expiratory time  
102 (I:E) 1:2, inspired oxygen concentration ( $F_{I}O_2$ ) 0.3 and positive end-expiratory pressure (PEEP) 8  
103 cmH<sub>2</sub>O;  $V_T$ , I:E and PEEP were maintained constant throughout the protocol.  $F_{I}O_2$  was adjusted aiming  
104 at  $PaO_2 > 10$  kPa. Respiratory rate was set at 25, but adjusted to keep  $PaCO_2 < 6,5$  kPa.

105 A pulmonary artery catheter (Edwards Life-Science, Irvine CA, USA) for measurement of cardiac  
106 output (CO) and pulmonary artery pressures, and a triple lumen central venous catheter for fluid  
107 infusions were inserted via the right jugular vein. An arterial catheter for blood sampling and blood  
108 pressure measurement was inserted in the right carotid artery, and a PiCCO (pulse contour cardiac  
109 output) catheter (PV2015L20, Pulsion, Munich, Germany) was inserted in the right femoral artery for  
110 estimation of stroke volume variation (SVV) and extravascular lung water (EVLW). Blood gas analysis  
111 was executed on an ABL 3 analyzer, (Radiometer, Copenhagen, Denmark) and performed immediately  
112 after sampling. Hemoglobin and hemoglobin oxygen saturation was separately analyzed with a  
113 hemoximeter OSM 3 (Radiometer, Copenhagen, Denmark) calibrated for porcine hemoglobin.

114 A midline laparotomy was performed and the bladder catheterized for urinary drainage. Caecum was  
115 identified and a small incision made, feces was collected and the incision closed. A large-bore intra-  
116 peritoneal drain was inserted, and the abdominal incision closed.

117

## 118 **Study protocol**

119 Preparation was followed by at least 30 min of stabilization, after which baseline measurements were  
120 performed (Fig 1). Fecal peritonitis was induced by peritoneal instillation of autologous feces (2 g/kg

121 body weight in 200 ml warmed 5% glucose solution). The intraperitoneal drain was removed, and the  
122 abdominal wall closed. With the induction of fecal peritonitis the infusion of Ringer's Acetate was  
123 discontinued.

124 **Fig 1. Experimental Time Line.**

125 After peritonitis induction, animals were randomized to intervention with AF-16 (n=8) or control group  
126 (n=8), (block randomization: 4x4 sealed, opaque envelopes). The research team was blinded for the  
127 group allocation. Following the onset of hemodynamic instability (defined as MAP <60 mmHg for >5  
128 min) the intervention group received an initial bolus of AF-16 (Batch No. 09431, KJ Ross Petersen ApS,  
129 Copenhagen, Denmark) 20 mg/kg (50 mg/ml in 0.9% saline), over duration of 10 minutes. The initial  
130 bolus dose was followed by an infusion of 40 mg/kg over 50 minutes. The control group received equal  
131 volumes of the vehicle (0.9% saline) instead. After four and eight hours the bolus dose was repeated  
132 (AF-16 or vehicle). Piperacillin/Tazobactam 2 gram every 8 hours i.v. and a protocolized resuscitation  
133 were initiated following established hemodynamic instability.

134  
135 Both intervention and control groups were submitted to a protocolized resuscitation aiming at a MAP >  
136 60 mmHg. Fluid resuscitation was initiated with Ringer's Acetate 10 ml/kg/h. If signs of hypovolemia  
137 (SVV > 15% maintained for 10 min) a bolus of 150 ml Ringer's Acetate was administered. Fluid boluses  
138 were repeated until SVV was stable < 15%. When SVV decreased to < 13% with MAP >60 mmHg,  
139 infusion was tapered down to 5 ml/kg/h, and if the animal was stable and SVV maintained < 13% the  
140 infusion was stopped. If signs of hypovolemia again appeared infusion was first started with 5 ml/kg/h  
141 then 10 ml/kg/h, then boluses of 150 ml were administered. In case of hypotension (MAP < 60 mmHg)  
142 without increased SVV, infusion of norepinephrine 5 ml/h (40 µg/ml) was started following a bolus of  
143 1 ml (40 µg/ml), and increased stepwise by 5 ml/h. Glucose 30 % infusion was administered, aiming at  
144 blood glucose 5-10 mmol/L, starting with 0.5 ml/kg/h. If b-glucose > 10 mmol/L an insulin infusion  
145 1E/ml was started with 1 ml/h.

146

147 We performed blood gas analyses at baseline, after onset of shock and every hour for the following  
148 twenty hours duration of the experiment. At the same time points, hemodynamic parameters (systemic  
149 and pulmonary pressures, CO, heart rate), respiratory parameters ( $F_{I}O_2$ ,  $SaO_2$ ,  $ETCO_2$ , plateau pressure,  
150 dynamic and static compliance) and hourly urine output were measured. Every three hours EVLW was  
151 measured and mixed venous blood gas analysis performed. Stroke volume variation (SVV) was  
152 monitored continuously in order to guide fluid administration.

153 The animals were euthanized with 100 mmol KCl i.v. at the end of the experiment under deep anesthesia.  
154 Thereafter the chest wall was opened. Lung tissue samples were collected from both lungs from the  
155 following regions: apical-medial, medial-medial, caudal-dorsal, caudal-medial and caudal-ventral.  
156 Samples were also taken from heart, liver, kidney, intestine and skin. The samples were immediately  
157 immersed in 10% buffered formalin. A veterinary pathologist who was blinded for the group allocation  
158 evaluated the samples histologically. Wet-to-dry ratio was measured in the above mentioned lung  
159 regions from the right lung. Samples were weighed, and dried in an oven, at 50° C, until the weight did  
160 not differ between two measurements.

161

## 162 **Statistical analysis**

163 The Mead Resource Equation was used to determine sample size [25]. We used the Shapiro-Wilk test  
164 to test the data for normality. We compared groups with the two-tailed Student's t-test, Mann-Whitney  
165 U-test, or the Kruskal-Wallis test. Two-way repeated measures ANOVA was used to compare  
166 differences within and between the groups over time. Tukey post hoc test was applied when appropriate.  
167 Last observation carried forward was used as imputation of missing data because of early deaths. The  
168 data are expressed as mean +/- SD or median (interquartile range) when appropriate. The statistical  
169 analyses were conducted by SPSS v. 20.0.0 software (SPSS, Inc., Chicago, IL, USA). A *p*-value of <  
170 0.05 was considered to be statistically significant.

171

## 172 **Results**

173 The two groups were comparable at baseline regarding hemodynamics and respiratory parameters  
174 (Table 1). Mean time from peritonitis induction to onset of hemodynamic instability was 4.5 +/- 2.2 and  
175 4.9 +/- 1.2 hours in treatment and control groups, respectively.

176 **Table 1. Measurements at baseline.**

|                                                         | <b>AF-16</b> | <b>Control</b> |
|---------------------------------------------------------|--------------|----------------|
| <b>MAP (mmHg)</b>                                       | 74 +/- 13    | 71 +/- 12      |
| <b>HR (BPM)</b>                                         | 82 +/- 11    | 90 +/- 10      |
| <b>CO (l/min)</b>                                       | 2.4 +/- 0.7  | 2.7 +/- 0.7    |
| <b>MPAP (mmHg)</b>                                      | 19 +/- 3     | 18 +/- 3       |
| <b>EVLW (ml)</b>                                        | 360 +/- 90   | 290 +/- 40     |
| <b>SVV (%)</b>                                          | 10 +/- 4     | 8 +/- 4        |
| <b>PaO<sub>2</sub>/F<sub>i</sub>O<sub>2</sub> (kPa)</b> | 60 +/- 3     | 61 +/- 5       |
| <b>Static compliance (ml/cmH<sub>2</sub>O)</b>          | 34 +/- 6     | 32 +/- 5       |

177 Values expressed as mean +/- SD. MAP (mean arterial pressure), HR (heart rate), CO (cardiac output), MPAP  
178 (mean pulmonary arterial pressure), EVLW (extra vascular lung water), SVV (stroke volume variation) and  
179 PaO<sub>2</sub>/F<sub>i</sub>O<sub>2</sub> (the arterial oxygen tension/ inspired oxygen tension).

180

181 Nine out of the sixteen animals survived the experiment until euthanasia (20 hours), while four and three  
182 animals died during the 20-hours observation period in treatment and control groups, respectively (Fig  
183 2). There was no statistically significant difference in survival between intervention and control groups.

184 **Fig 2. Kaplan-Meyer analysis of survival.**

185

186

## 187 **Gas exchange and lung mechanics**

### 188 **Gas exchange**

189 After established hemodynamic instability both groups presented with a decline in oxygenation  
 190 ( $\text{PaO}_2/\text{F}_1\text{O}_2$  ratio). The AF-16 group went from 60 +/- 3.0 kPa at baseline, to 33 +/- 13.9 kPa at the end  
 191 of the protocol, the control group went from 61 +/- 4.7 kPa, to 27 +/- 15.7 kPa at the same time points  
 192 (Table 2). There was no statistically significant difference in oxygenation between the intervention and  
 193 control groups (two way ANOVA  $F(2, 54) = 0.093, p = 1$ ) as a function of time. Respiratory rate was  
 194 adjusted to keep  $\text{PaCO}_2$  under 6.5 kPa (Table 2).

195 **Table 2. Respiratory parameters.**

|                                                         | <b>Group</b> | <b>Baseline</b> | <b>S0</b>   | <b>End</b>  |
|---------------------------------------------------------|--------------|-----------------|-------------|-------------|
| <b>PaO<sub>2</sub>/F<sub>1</sub>O<sub>2</sub> (kPa)</b> | AF-16        | 60 +/- 3.0      | 49 +/- 3.5  | 33 +/-13.9  |
|                                                         | Control      | 61 +/- 4.7      | 49 +/- 6.9  | 27 +/- 15.7 |
| <b>Driving Pressure (mmHg)</b>                          | AF-16        | 7 +/- 1.2       | 9 +/- 1.5   | 18 +/- 2.6  |
|                                                         | Control      | 8 +/- 3.2       | 9 +/- 2.8   | 20 +/- 10.8 |
| <b>Static compliance (ml/cmH<sub>2</sub>O)</b>          | AF-16        | 34 +/- 6.3      | 26 +/-2.4   | 15 +/- 2.9  |
|                                                         | Control      | 32 +/- 5.4      | 27 +/-5.7   | 15 +/- 5.1  |
| <b>Dynamic compliance (ml/cmH<sub>2</sub>O)</b>         | AF-16        | 28 +/- 4.2      | 23 +/- 2.9  | 12 +/- 3.0  |
|                                                         | Control      | 26 +/- 6.1      | 22 +/- 4.7  | 11 +/- 4.5  |
| <b>Saturation (%)</b>                                   | AF-16        | 96 +/- 0.3      | 94 +/- 1.4  | 91 +/- 5.9  |
|                                                         | Control      | 97 +/- 0.9      | 94 +/- 1.4  | 85 +/- 10.9 |
| <b>MPAP (mmHg)</b>                                      | AF-16        | 19 +/- 2.8      | 22 +/- 3.0  | 29 +/- 5.9  |
|                                                         | Control      | 18 +/- 2.7      | 23 +/- 3.6  | 28 +/- 5.6  |
| <b>PaCO<sub>2</sub> (kPa)</b>                           | AF-16        | 5.5 +/- 0.4     | 5.9 +/- 0.1 | 4.9 +/- 1.5 |
|                                                         | Control      | 5.2 +/- 0.5     | 5.8 +/- 0.4 | 6.5 +/- 1.2 |

196 Values expressed as means +/- SD.  $\text{PaO}_2/\text{F}_1\text{O}_2$  (the arterial oxygen tension/ inspired oxygen tension), MPAP (mean  
 197 pulmonary arterial pressure),  $\text{PaCO}_2$  (arterial CO<sub>2</sub> tension).

198

## 199 **Lung mechanics**

200 Static compliance decreased from 34 +/- 6.3 ml/cm H<sub>2</sub>O at baseline in the intervention group, to 15 +/-  
 201 2.9 ml/cm H<sub>2</sub>O at the end of the protocol and from 32 +/- 5.4 ml/cm H<sub>2</sub>O to 15 +/- 5.1 ml/cm H<sub>2</sub>O in the  
 202 control group (Table 2), (two-way ANOVA,  $F(21,252) = 0.145, p = 1.00$ ). Dynamic compliance and  
 203 driving pressure changed comparably in both groups during the length of the experiment (Table 2).

204

205 **Hemodynamic parameters**

206 **Extravascular lung water (EVLW) and Stroke Volume Variation (SVV)**

207 There was no statistically significant difference in EVLW evolution between intervention and control  
 208 groups as a function of time (two-way ANOVA,  $F(7,87) = 0.77, p = 0.614$ ). EVLW increased from 360  
 209 +/- 90 ml at baseline to 550 +/- 370 ml at the end of the observation period, and from 290 +/- 40 ml to  
 210 450 +/- 300 ml in the intervention and control groups, respectively (Table 3). Neither was there any  
 211 statistically significant difference between groups as a function of time regarding SVV (Table 3).

212 **Table 3. Hemodynamic parameters.**

|                              | <b>Group</b> | <b>Baseline</b> | <b>S0</b>     | <b>End</b>    |
|------------------------------|--------------|-----------------|---------------|---------------|
| <b>MAP (mmHg)</b>            | AF-16        | 74 +/- 12.5     | 57 +/- 2.9    | 59 +/- 17.6   |
|                              | Control      | 71 +/- 11.6     | 57 +/- 2.7    | 58 +/- 14.5   |
| <b>HR (BPM)</b>              | AF-16        | 82 +/- 11       | 159 +/- 21    | 117 +/- 34    |
|                              | Control      | 90 +/- 10       | 139 +/- 32    | 112 +/- 23    |
| <b>CO (l/min)</b>            | AF-16        | 2.4 +/- 0.7     | 2.5 +/- 0.2   | 2.9 +/- 2.0   |
|                              | Control      | 2.7 +/- 0.7     | 2.1 +/- 0.3   | 2.9 +/- 1.2   |
| <b>pH</b>                    | AF-16        | 7.44 +/- 0.03   | 7.36 +/- 0.03 | 7.33 +/- 0.18 |
|                              | Control      | 7.47 +/- 0.04   | 7.39 +/- 0.04 | 7.24 +/- 0.20 |
| <b>Lactate (mmol/l)</b>      | AF-16        | 3.0 +/- 1.2     | 2.6 +/- 1.0   | 3.6 +/- 4.0   |
|                              | Control      | 2.6 +/- 1.0     | 2.2 +/- 0.8   | 3.9 +/- 4.0   |
| <b>Hb (g/l)</b>              | AF-16        | 87 +/- 7.7      | 119 +/- 12    | 94 +/- 10     |
|                              | Control      | 85 +/- 5.3      | 122 +/- 5     | 100 +/- 6     |
| <b>SVV (%)</b>               | AF-16        | 10 +/- 3.6      | 21 +/- 7.7    | 15 +/- 8.1    |
|                              | Control      | 8 +/- 4.0       | 14 +/- 2.0    | 16 +/- 6.4    |
| <b>EVLW (ml)</b>             | AF-16        | 360 +/- 90      | 400 +/- 14    | 550 +/- 370   |
|                              | Control      | 290 +/- 40      | 280 +/- 40    | 450 +/- 300   |
| <b>ERO<sub>2</sub> (kPa)</b> | AF-16        | 58.6 +/- 12.5   | 55.4 +/- 6.6  | 49.1 +/- 12.8 |
|                              | Control      | 49.4 +/- 9.3    | 51.7 +/- 9.0  | 44.3 +/- 8.6  |

213 Values as mean +/- SD. MAP (mean arterial pressure), HR (heart rate), CO (cardiac output), Hb (Hemoglobin  
 214 concentration), SVV (stroke volume variation), EVLW (extra vascular lung water), and ERO<sub>2</sub> (the oxygen  
 215 extraction ratio).

216

217

218 **Mean arterial blood pressure and heart rate**

219 The onset of hemodynamic instability was defined as mean arterial pressure under 60 mmHg, both  
220 intervention and control groups presented with increases in heart rate at this stage of the experiment  
221 (Table 3). There was no statistically significant difference between groups regarding heart rate  
222 throughout the observation period (Two way ANOVA,  $F(21,252) = 0.765$ ,  $p = 0.761$ ). Onset of  
223 hemodynamic instability was also accompanied by an increase in hemoglobin concentration in both  
224 groups, while no statistically significant difference between groups was detected (Two way ANOVA,  
225  $F(21,253) = 0.214$ ,  $p = 1.00$ ). The two groups did not differ in a statistically significant way in either  
226 lactate, pH or oxygen extraction ratio (Table 3).

## 227 **Fluid balance**

228 There was no statistically significant difference between groups in fluid requirements, urinary output,  
229 fluid balance (these parameters described as ml/kg/h of sepsis duration), norepinephrine consumption  
230 ( $\mu\text{g}/\text{kg}/\text{h}$  of sepsis duration) nor percentage body weight gain (kg body weight before and after  
231 experiment) (Table 4).

232 **Table 4. Fluid balance**

|                                                                     | <b>AF-16</b>  | <b>Control</b> |
|---------------------------------------------------------------------|---------------|----------------|
| <b>Fluid requirement</b><br>(ml/kg/h sepsis)                        | 17 +/-10      | 15 +/- 4       |
| <b>Urinary output</b><br>(ml/kg/h sepsis)                           | 1,3 +/- 1     | 1,5 +/- 1      |
| <b>Fluid balance</b><br>(ml/kg/h sepsis)                            | +16 +/- 10    | +14 +/- 4      |
| <b>Norepinephrine</b><br>( $\mu\text{g}/\text{kg}/\text{h}$ sepsis) | 37.5 +/- 32.6 | 32.3 +/- 24.6  |
| <b>% weight gain</b>                                                | 33 +/- 22     | 51 +/- 26      |

233

234

## 235 **Wet-to-dry ratio**

236 Wet-to-dry ratio at the end of the experiment did not differ in a statistically significant manner between  
237 intervention and control groups. Samples from lung, skin, intestine, heart (left ventricle), kidney and

238 liver were analyzed. Lung samples were analyzed separately and pooled together. Skin had the lowest  
239 water content, kidney the highest (Table 5).

240 **Table 5. Wet-to-dry ratio**

|                      | <b>AF-16</b>  | <b>Control</b> |
|----------------------|---------------|----------------|
| <b>Lung w/d</b>      | 1,06 +/- 0,01 | 1,06 +/- 0,01  |
| <b>Skin w/d</b>      | 1,02 +/- 0,01 | 1,01 +/- 0,01  |
| <b>Intestine w/d</b> | 1,08 +/- 0,04 | 1,08 +/- 0,04  |
| <b>Heart w/d</b>     | 1,08 +/- 0,02 | 1,07 +/- 0,03  |
| <b>Kidney w/d</b>    | 1,13 +/- 0,05 | 1,10 +/- 0,03  |
| <b>Liver w/d</b>     | 1,08 +/- 0,02 | 1,08 +/- 0,02  |

241 Values expressed as mean +/- SD.

242

## 243 **Histology**

244 Abnormal lesions were found most commonly in the lungs and the intestine. The intensity of lesions  
245 was graded in a semi quantitative way, based on the numbers of inflammatory cells and the extension  
246 and distribution of the cell infiltrates/lesions. Inflammatory cell exudates in lung samples included  
247 neutrophils, monocytes and macrophages. Leucocytes were increased in the interstitium, vessels and  
248 perivascular space (Fig 3a and 3b).

### 249 **Figs 3a and 3b. Histology of lung samples, AF-16 vs control.**

250 **3a** Intense inflammatory cell reaction shows leukocytes rich in polymorphs in the alveoli (down, at left) and in the  
251 capillaries in the interlobular septum (AF-16). **3b** Bronchial vessel shows leukocytes adhering at the endothelium.  
252 It could be an early stage in the process of leukocyte migration through the vessel wall, but leukocytes seem to  
253 remain in the intima which is suggestive of endoarteriolitis, which could be predisposing for thrombosis (control).

254

255 Vessels often displayed prominent endothelial cells and leucocytes were found in the process of  
256 margination and migration through the vessel wall. Many lung samples showed edema, hemorrhages  
257 and recently originated micro-thrombi in small-sized vessels commonly blocking the lumen; sometimes  
258 with adjacent alveolar areas with congested septal capillaries, hemorrhages and pyknotic cells  
259 suggestive of necrosis. There was no statistically significant difference between intervention and control  
260 groups regarding inflammation or edema in lung samples (Table 6).

### 261 **Table 6. Lung Histology**

|            | <b>Leukocytes, AF-16</b> | <b>Leukocytes, Control</b> | <b>Atelectasis, AF-16</b> | <b>Atelectasis, Control</b> | <b>Edema, AF-16</b> | <b>Edema, Control</b> |
|------------|--------------------------|----------------------------|---------------------------|-----------------------------|---------------------|-----------------------|
| <b>AMR</b> | 1.5 (0-3)                | 2.5 (1-3)                  | 0.5 (0-3)                 | 0.5 (0-4)                   | 2 (0-4)             | 3 (0-4)               |
| <b>MMR</b> | 1.5 (0-4)                | 1.5 (1-4)                  | 0.5 (0-4)                 | 1 (0-3)                     | 1.5 (0-4)           | 2 (0-4)               |
| <b>CMR</b> | 1.5 (0-3)                | 3 (1-4)                    | 4 (2-4)                   | 3.5 (2-4)                   | 2.5 (0-4)           | 2.5 (1-4)             |
| <b>CDR</b> | 1.5 (0-2)                | 3 (1-4)                    | 4 (2-4)                   | 4 (2-4)                     | 2.5 (0-2)           | 3 (1-4)               |
| <b>CVR</b> | 1.5 (0-2)                | 2.5 (0-4)                  | 4 (3-4)                   | 4 (3-4)                     | 2.5 (1-4)           | 3.5 (1-4)             |

262 Values expressed as median (min-max). No statistically significant difference between groups, statistics presented  
263 for pooled data in the following order: leucocytes, atelectasis and edema (Kruskal-Wallis  $p = 0.169$ , Kruskal-  
264 Wallis  $p = 0.672$ , Kruskal-Wallis  $p = 0.751$ ).

265

266 The intestines showed severe acute degenerative and necrotic changes in the mucosa. Some samples of  
267 intestine showed signs of transmural inflammation. There was no difference between intervention and  
268 control groups regarding signs of inflammation in samples of intestine, (Median 3, min 0, max 4 in both  
269 groups) (Kruskal-Wallis,  $p = 0.321$ ). (Figs 5 and 6).

#### 270 **Figs 4a and 4b. Histology of intestine and mesenterium.**

271 4a the mucosa is down at left and the serosa is at right. The serosa shows a rich fibrinopurulent exudate, consistent  
272 with peritonitis. Leukocytes between the smooth muscle layers also are visible (AF-16). 4b Mesenterium. Necrosis  
273 and intense inflammatory reaction in the fat and connective tissues, consistent with peritonitis (control).

274 There were few signs of lesions (vacuoles, inflammation) in samples of heart, liver and kidney. No  
275 lesions were detected in skin biopsies.

276

## 277 **Discussion**

278 In this experimental study of peritonitis induced sepsis, intervention with the anti-secretory and anti-  
279 inflammatory peptide AF-16 did not yield any reversal of sepsis symptoms as reflected in signs of  
280 inflammation, fluid balance, hemodynamics, tissue edema, norepinephrine consumption, gas exchange  
281 or respiratory mechanics.

282 We used a model of fecal peritonitis induced sepsis, previously described by Correa et al. [26]. Prior to  
283 the main protocol we performed a pilot study of four animals, in which all 4 animals died before finishing  
284 the protocol of fulminant shock symptoms (S7 Table, supplemental data). The animals of the pilot study

285 presented with sepsis after a mean duration of peritonitis of 4.25 +/- 0.5 hours, mean survival 11.5 +/-  
286 4.0 hours. Although the onset of hemodynamic instability (MAP <60 mmHg for more than five minutes)  
287 was the same in the sixteen animals included in the main series, sepsis was not as homogenously severe,  
288 and nine animals survived until euthanasia.

289 This model of sepsis has features in common with peritonitis induced sepsis in patients. The animals  
290 received autologous feces in the peritoneum to mimic intestinal perforation. Despite the prompt  
291 identification of hemodynamic instability in the absence of intravenous fluid administration, followed  
292 by immediate administration of antibiotics and fluid resuscitation, the mortality was substantial, 44% of  
293 the animals died before finishing the observation period of twenty hours.

294 The definition of septic shock in humans include an increased serum lactate > 2 mmol/L despite adequate  
295 fluid resuscitation. In this study we did not observe any statistically significant hyperlactatemia. Oxygen  
296 extraction ratio however declined significantly in both groups as a sign of either diminished oxygen  
297 demand or inefficient utilization of oxygen in the tissues.

298 Peritonitis induced impairment of gas exchange and lung mechanics in the current study were similar to  
299 Acute Respiratory Distress Syndrome (ARDS) in humans. At the end of the protocol all but three  
300 animals fulfilled oxygenation criteria for ARDS. This decrease in oxygenation was accompanied with a  
301 significant decline in both static and dynamic compliance and an increase in driving pressure with  
302 predefined tidal volumes.

303 There was no statistically significant difference in EVLW evolution between the groups during the  
304 experiment, all except three animals (one from intervention group and two control animals) did manifest  
305 an increase in EVLW, ranging from 7 % to 279 %.

306 In a previous study [23] we examined the potential effect of AF-16 on resolution of pulmonary edema  
307 in a model of ventilator induced lung injury, consisting of lung lavages and injurious ventilation. In that  
308 study a statistically significant reduction of EVLW in the intervention group was found, as an isolated  
309 finding. That finding was not reproduced in the present study, and although all animals did not respond

310 with an increase in EVLW, leaving out the “EVLW non responders” in post-hoc analysis did not yield  
311 a different outcome.

312 The endogenous protein AF, and its active sequence AF-16, counteract edema and abnormal fluid flux  
313 [17-20,27,28]. In addition, AF protein/peptide exerts anti-inflammatory properties in a variety of  
314 conditions [15,21,22]. Neither AF nor AF-16 affect healthy tissue [28].

315 In models of edema and increased interstitial fluid pressure AF-16 has an early effect [18,28]. In a study  
316 by Jennische et al, intranasal administration of AF-16 reduced ICP after 15 min, but no effect on  
317 inflammatory response in brain could be discerned [19]. The endogenous AF response to an  
318 inflammatory stimulus is considered to be slower. Exposure to pro-inflammatory stimulus in form of  
319 LPS or IFN- $\gamma$  results in an increase in AF expression and redistribution from perinuclear area to cell  
320 surface over a time period of several days, expression peaks with severity of disease and thereafter  
321 returns to baseline. It has previously been speculated that AF plays its main role in modifying the  
322 immune response in the resolution phase of an inflammatory reaction, rather than at the beginning of an  
323 immunological response [12,14,15]. AF-activity is low in health and in chronic inflammatory  
324 conditions, and therefore chronic inflammation might benefit better from treatment with AF/AF-16 than  
325 acute conditions [13].

326 In this study AF-16 was given in repeated doses, the initial dose being three times higher than in our  
327 previous ventilator induced lung injury (VILI) model [23]. We cannot rule out that the intervention with  
328 AF-16 would be more effective at an even higher or continuous dose, as AF in plasma has a rapid  
329 turnover rate [12], or that an effect could have been observed in a less severe shock state. Moreover, the  
330 number of animals studied was limited, so minor changes between the groups might not have been  
331 noticed. We cannot rule out the possibility that AF or AF-16 could be effective in a later stage of sepsis.

332 This study has limitations. No animal model reproduces the full picture of sepsis/septic shock in humans.  
333 The biological heterogeneity in sepsis patients, with differences in age, comorbidities, medications and  
334 different sources of infection adds to the complexity of the syndrome. This complexity cannot be fully  
335 represented in an animal model. In the present peritonitis/sepsis model the pigs are healthy prior to the

336 experiment. One must also accept the possibility of interspecies variability in intestinal flora and host  
337 response to both infection and intervention.

338 We conclude that, contrary to our hypothesis, in this pilot study in a porcine experimental model of fecal  
339 peritonitis and sepsis we could not detect any differences between intervention and control groups  
340 regarding reversal of shock symptoms, gas exchange or respiratory mechanics. The results suggest that  
341 AF-16 does not ameliorate sepsis symptoms.

342

343

#### 344 **Declaration of potential conflicts of interest**

345 The authors ABT, JvdH, FM, IB, RF, AL, and JT declare the absence of conflicts of interests. HAH has  
346 patents and patent applications related to AF peptides. He has not been involved in the execution of the  
347 experiments or data analyses.

348

349

350

351

352

353

354

355

356

357

358

## 359 **References**

- 360 1. Singer M, Deutschman CS, Seymour CW, Shankar-Hari M, Annane D, Bauer M., et al. The Third  
361 International Consensus Definitions for Sepsis and Septic Shock (Sepsis-3). *JAMA*. 2016;315:801–  
362 810.
- 363 2. Seymour CW, Liu VX, Iwashyna TJ, Brunkhorst FM, Rea. TD, Scherag A, et al. Assessment of  
364 Clinical Criteria for Sepsis For the Third International Consensus Definitions for Sepsis and Septic  
365 Shock (Sepsis-3). *JAMA*. 2016;315:762–774.
- 366 3. Shankar-Hari M, Phillips GS, Levy ML, Seymour CW, Liu VX, Deutschman CS, et al. Developing  
367 a New Definition and Assessing New Clinical Criteria for Septic Shock For the Third International  
368 Consensus Definitions for Sepsis and Septic Shock (Sepsis-3). *JAMA*. 2016;315:775–787.
- 369 4. Prescott H, Angus DC. Enhancing Recovery From Sepsis A Review. *JAMA*. 2019;319:62–75.
- 370 5. Fleischmann C, Scherag A, Adhikari NKJ, Hartog CS, Tsaganos T, Schlattmann P, et al.  
371 Assessment of Global Incidence and Mortality of Hospital-treated Sepsis. *Am J Respir Crit Care Med*.  
372 2016;193:259–272.
- 373 6. Rhodes A, Evans LE, Alhazzani W, Levy MM, Antonelli M, Ferrer R, et al. Surviving Sepsis  
374 Campaign : International Guidelines for Management of Sepsis and Septic Shock : 2016. *Intensive*  
375 *Care Med*. 2017;43:304–377.
- 376 7. Mitchell KH, Carlbom D, Caldwell E, Leary PJ, Himmelfarb J, Hough CL. Volume Overload :  
377 Prevalence, Risk Factors, and Functional Outcome in Survivors of Septic Shock. *Ann Am Thorac Soc*  
378 2015;12:1837–1844.
- 379 8. Acheampong A, Vincent J. A positive fluid balance is an independent prognostic factor in patients  
380 with sepsis. *Crit. Care* 2015;19: 1–7.
- 381 9. Malbrain MLNG, Marik PE, Witters I, Cordemans C, Kirkpatrick AW, Roberts DJ, et al. Fluid  
382 overload, de-resuscitation, and outcomes in critically ill or injured patients: a systematic review with

- 383 suggestions for clinical practice. *Anaesthesiol. Intensive Ther.* 2014;46:361–380.
- 384 10. Oliveira FSV, Freitas FGR, Ferreira EM, Castro I, Bafi AT, Azevedo ACP, et al. Positive fluid  
385 balance as a prognostic factor for mortality and acute kidney injury in severe sepsis and septic shock.  
386 *J. Crit. Care.* 2015;30:97–101.
- 387 11. You JW, Lee SJ, Kim YE, Cho YJ, Jeong YY, Kim HC, et al. Association between weight change  
388 and clinical outcomes in critically ill patients. *J. Crit. Care.* 2013;28:923–927.
- 389 12. Lange S, Lönnroth I. The Antisecretory Factor: Synthesis, Anatomical and Cellular Distribution,  
390 and Biological Action in Experimental and Clinical Studies. *Int. Rev. Cytol.* 2001;210: 39–74.
- 391 13. Johansson E, Lönnroth I, Jonson I, Lange S, Jennische E. Development of monoclonal antibodies  
392 for detection of Antisecretory Factor activity in human plasma. *J. Immunol. Methods* 2009;342:64–70.
- 393 14. Davidson TS, Hickey WF. Antisecretory factor expression is regulated by inflammatory mediators  
394 and influences the severity of experimental autoimmune encephalomyelitis. *J. Leucoc. Biol.*  
395 2004;74:835–844.
- 396 15. Davidson TS, Hickey WF. Distribution and immunoregulatory properties of antisecretory factor.  
397 *Lab. Investig.* 2004;84:307–319.
- 398 16. Johansson E, Lange S, Lönnroth I. Identification of an active site in the antisecretory factor  
399 protein. *Biochim. Biophys. Acta* 1997;1362:177–182.
- 400 17. Lönnroth I, Lange S. Purification and characterization of the antisecretory factor: a protein in the  
401 central nervous system and in the gut which inhibits intestinal hypersecretion induced by cholera  
402 toxin. *Biochim. Biophys. Acta* 1986;883:138–144.
- 403 18. Clausen F, Hansson HA, Raud J, Marklund N. Intranasal Administration of the Antisecretory  
404 Peptide AF-16 Reduces Edema and Improves Cognitive Function Following Diffuse Traumatic Brain  
405 Injury in the Rat. *Front Neuro* 2017;8:1-14.
- 406 19. Jennische E, Bergström T, Johansson M, Nyström K, Tarkowski A, Hansson HA. et al. The peptide

- 407 AF-16 abolishes sickness and death at experimental encephalitis by reducing increase of intracranial  
408 pressure. *Brain Res.* 2008;1227:189–197.
- 409 20. Johansson E, Al-Olama M, Hansson HA, Lange S, Jennische E. Diet-induced antisecretory factor  
410 prevents intracranial hypertension in a dosage-dependent manner. *Br. J. Nutr.* 2013; 109:247–2252.
- 411 21. Björck S, Bosaeus I, Ek E, Jennische E, Lönnroth I, Johansson E, et al. Food induced stimulation  
412 of the antisecretory factor can improve symptoms in human inflammatory bowel disease: A study of a  
413 concept. *Gut* 2000;46:824–829.
- 414 22. Eriksson A, Shafazand M, Jennische E, Lange S. Effect of antisecretory factor in ulcerative colitis  
415 on histological and laborative outcome: a short period clinical trial. *Scand. J. Gastroenterol.*  
416 2003;5521:1045–1049.
- 417 23. Tenhunen AB, Massaro F, Hansson HA, Feinstein R, Larsson A, Larsson A, et al. Does the  
418 Antisecretory Factor reduce lung edema in experimental ARDS. *Ups J Med Sci.* 2019;124:246-253
- 419 24. Lange S, Delbro DS, Jennische E, Johansson E, Lönnroth I. Recombinant or Plasma-Derived  
420 Antisecretory Factor Inhibits Cholera Toxin-Induced Increase in Evans Blue Permeation of Rat  
421 Intestinal Capillarie s. *Dig. Dis. Sci.* 1998;43:2061–2070.
- 422 25. Mead R. The Non-Orthogonal Design of Experiments. *J R Stat Soc.* 1990;153(2):151–201.
- 423 26. Corrêa TD, Vuda M, Takala J, Djafarzadeh S, Silva E, Jakob SM. Increasing mean arterial blood  
424 pressure in sepsis : effects on fluid balance , vasopressor load and renal function. *Crit. Care*  
425 2013;17:R21.
- 426 27. Hansson HA, Al-Olama M, Jennische E, Gatzinsky K, Lange S. The Peptide AF-16 and the AF  
427 Protein Counteract Intracranial Hypertension. *Acta Neurochir. Suppl.* 2012;114:377–382.
- 428 28. Al-Olama M, Wallgren A, Andersson B, Gatzinsky K, Hultborn R, Karlsson-Parra A, et al. The  
429 peptide AF-16 decreases high interstitial fluid pressure in solid tumors. *Acta Oncol.* 2011;50:1098–  
430 1104.

431

432

433

434

# Survival Functions



Figure



Figure



Figure



Figure



Figure



Figure
